# Supplementary material for: Synergy of a heteroatom (P–F) in nanostructured Sn3O4 as an anode for sodium-ion batteries
Source: Royal Society of Chemistry journal article supplement (doi:10.1039/d1se00219h), 2021-01-01
Supplement: d1se00219h1.pdf [file d1se00219h1.pdf]

## Electronic Supplementary information

### Synergy of heteroatom (P-F) in nanostructured Sn<sub>3</sub>O<sub>4</sub> as an anode for sodium ion battery

Ujjwala P Chothe<sup>a</sup>, Anuradha A Ambalkar<sup>a</sup>, Chitra K Ugale<sup>a</sup>, Milind V Kulkarni<sup>a</sup>, Bharat B Kale<sup>\*a</sup>

<sup>a</sup> Centre for Materials for Electronics Technology (C-MET), Ministry of Electronics and Information Technology (MeitY), Panchavati, Pune 411008, India  
E-mail: [bbkale@cmet.gov.in](mailto:bbkale@cmet.gov.in)

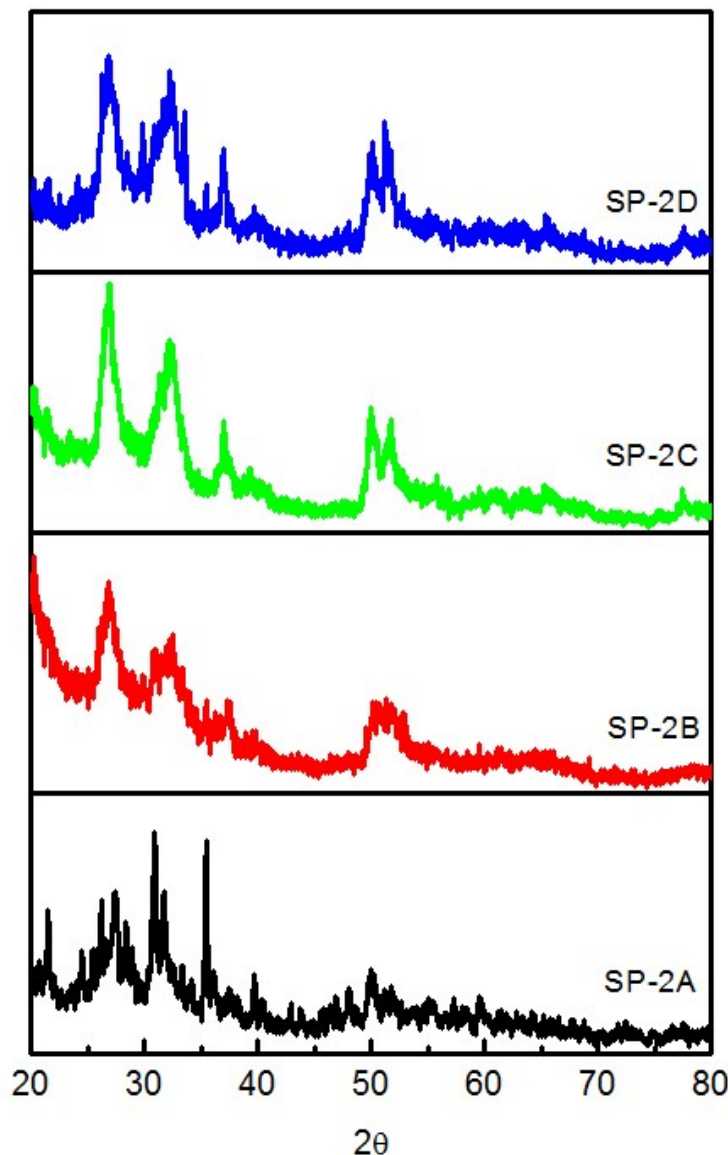

**Figure S1: XRD patterns of P@ Sn<sub>3</sub>O<sub>4</sub> samples synthesized at (a) SP-2A:150°C, 12h (b) SP-2B:150°C, 24h (c) SP-3A:180°C, 12 hr (d) SP-2D:180°C,24 h**

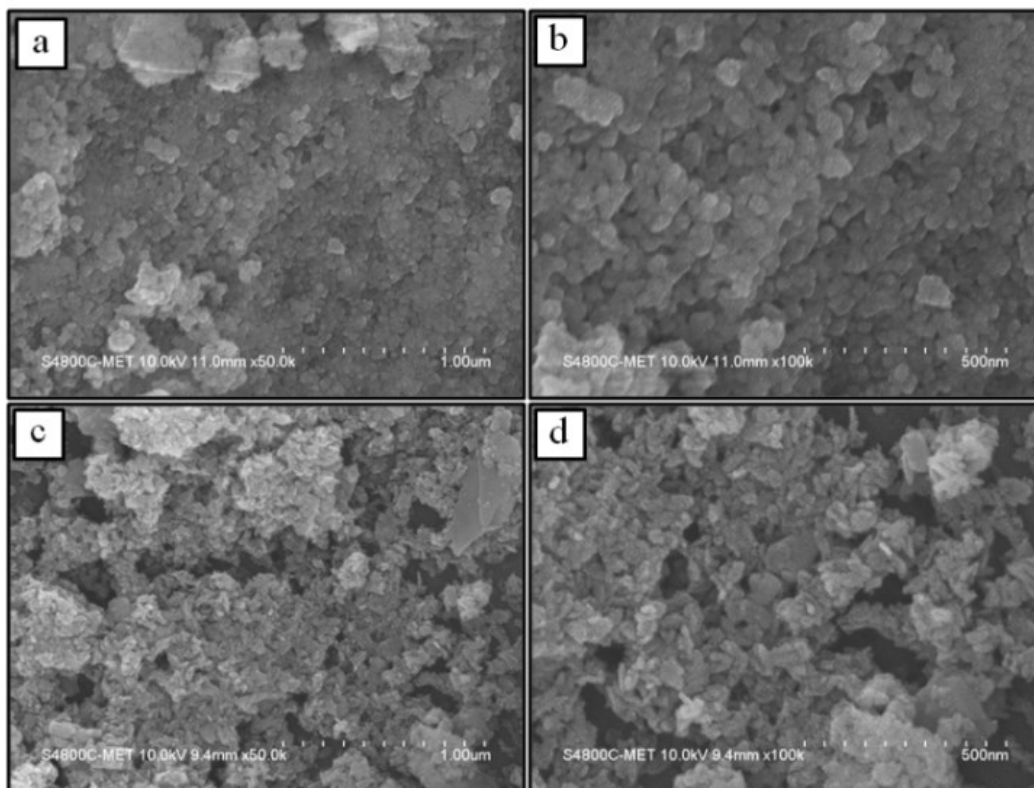

**Figure S2: FESEM images of Sn<sub>3</sub>O<sub>4</sub> samples at 150°C 24 h (a, b) SP-0@150 (c,d) SP-2@150 at low and high magnifications**

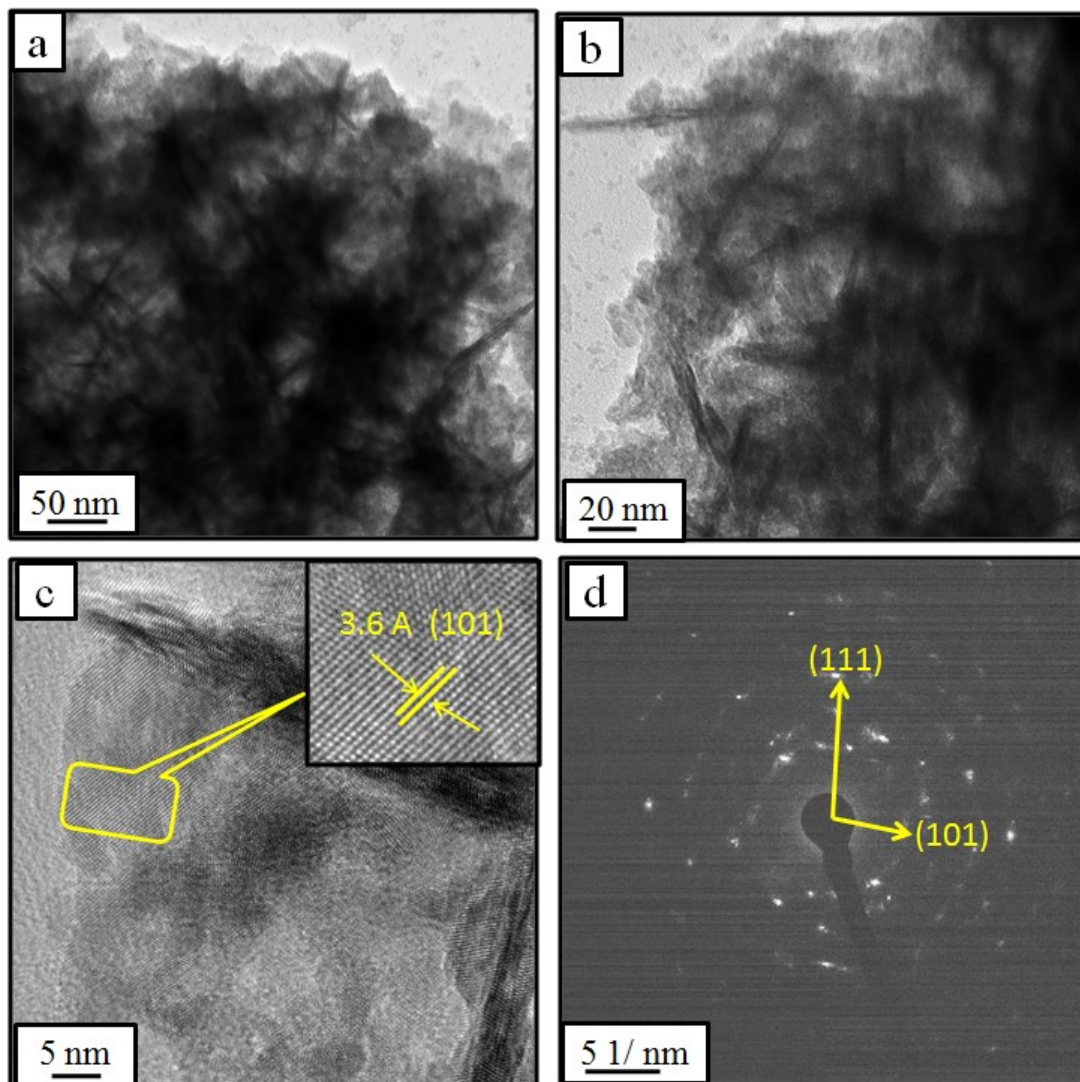

FigureS3: FETEM images of SP-0@150 at low and high magnifications

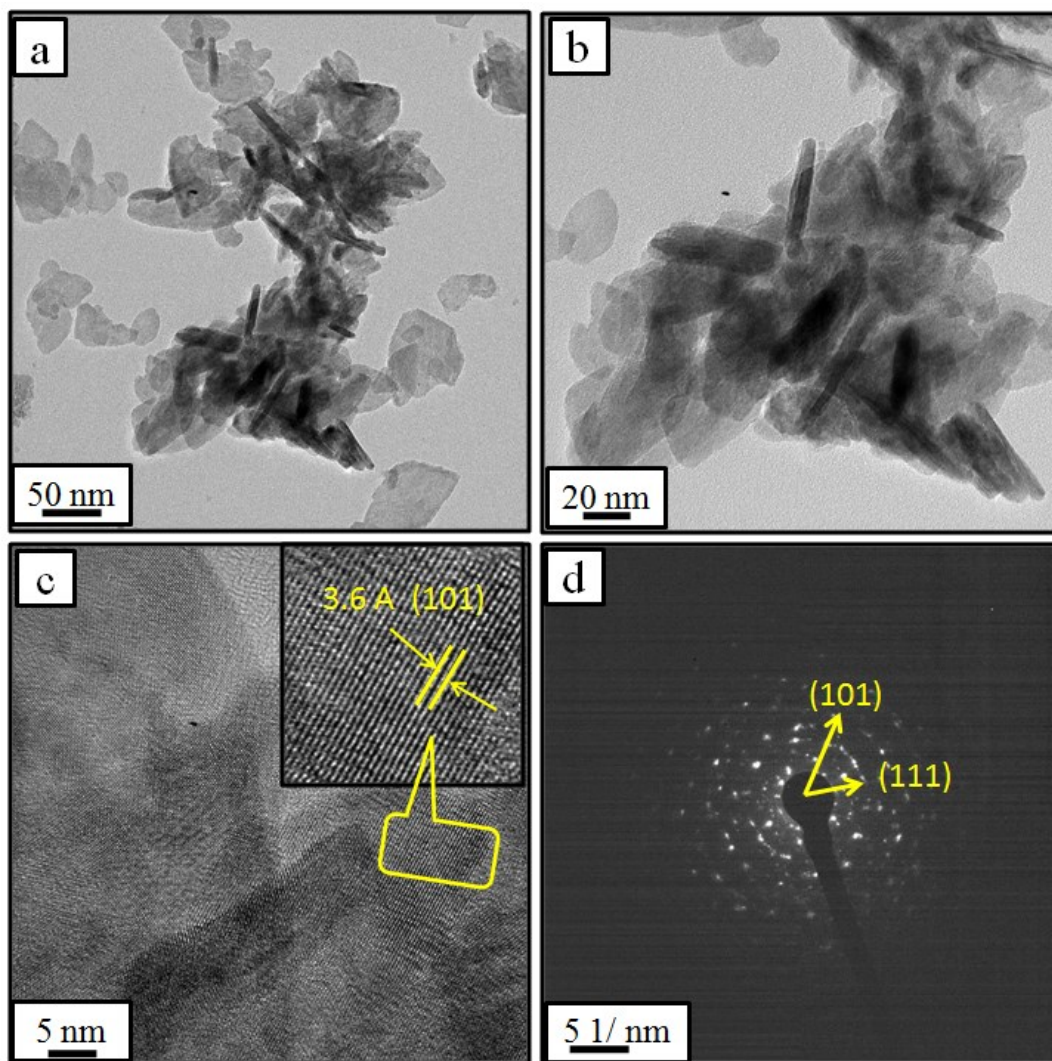

FigureS4: FETEM images of SP-0@180 at low and high magnifications

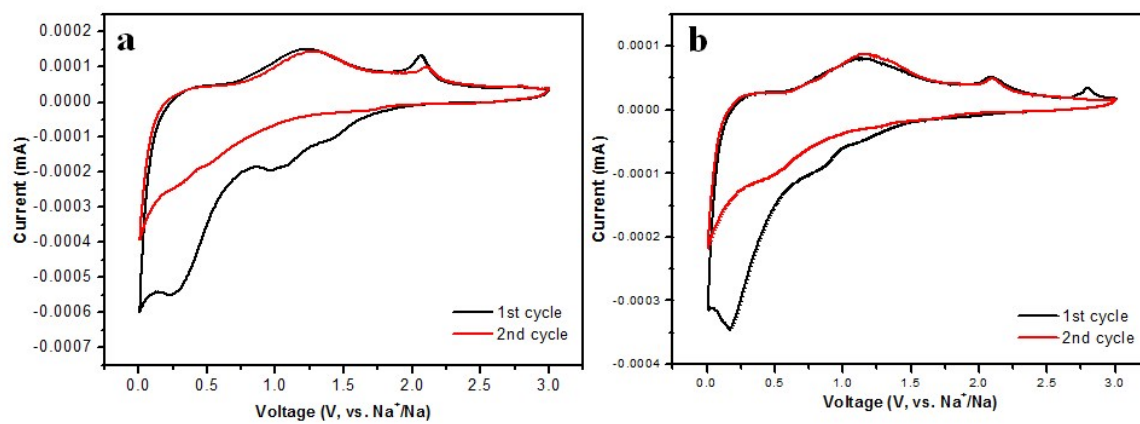

Figure S5: Cyclic Voltammetry curves of (a) SP-0@150 and (b) SP-2@150 at a scan rate of  $0.1 \text{ mVs}^{-1}$

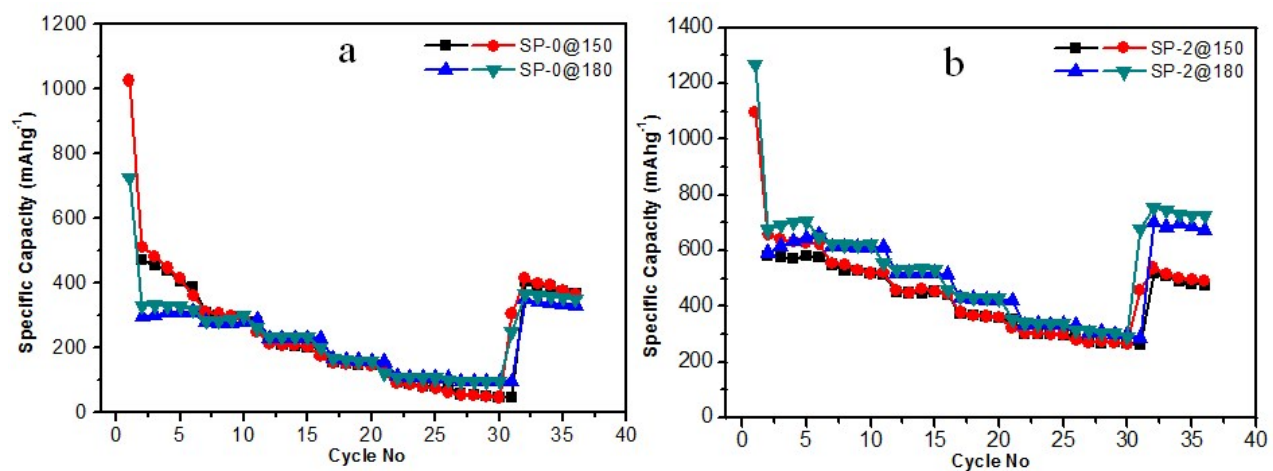

**Figure S6: The rate performance at different current densities of (a) pristine Sn<sub>3</sub>O<sub>4</sub> (SP-0) (b) P-F@Sn<sub>3</sub>O<sub>4</sub> (SP-2)**
